# Supplementary figures and images for: Synthesis, characterization and curing properties of a novel cyclolinear phosphazene-based epoxy resin for halogen-free flame retardancy and high performance
Source: Royal Society of Chemistry journal article supplement (doi:10.1039/c2ra20739g), 2012-01-01

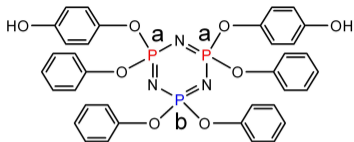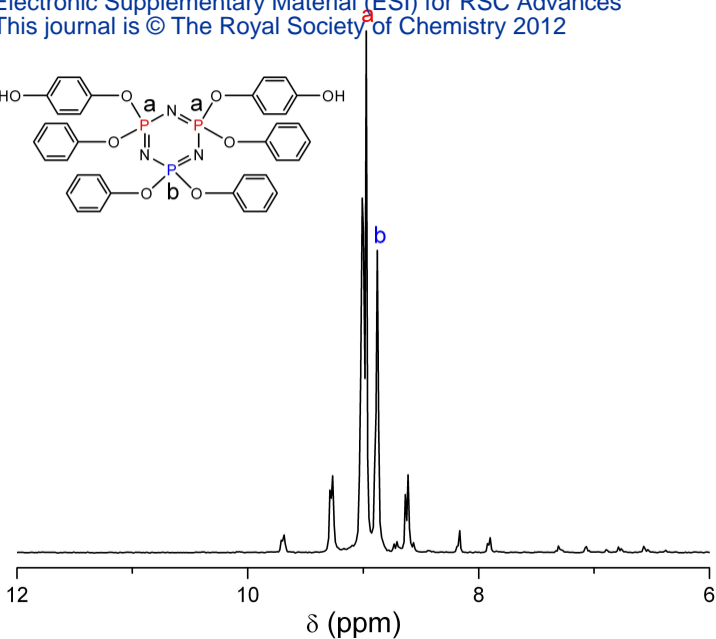

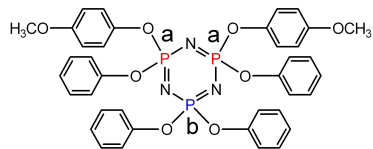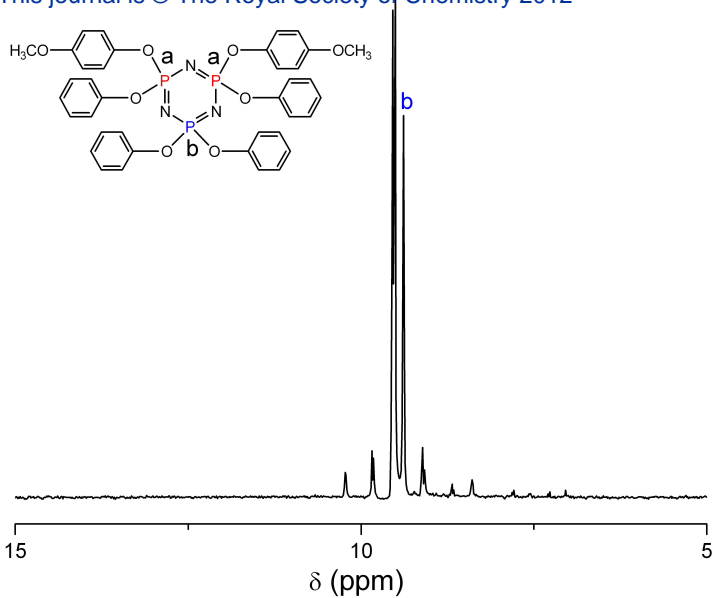

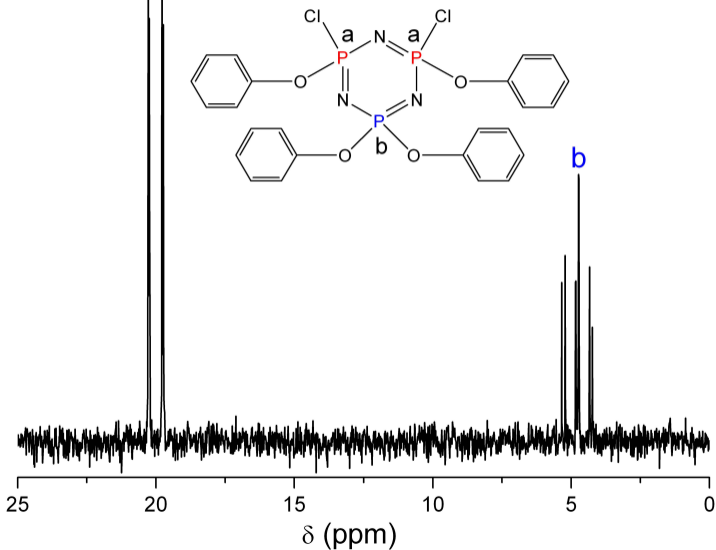

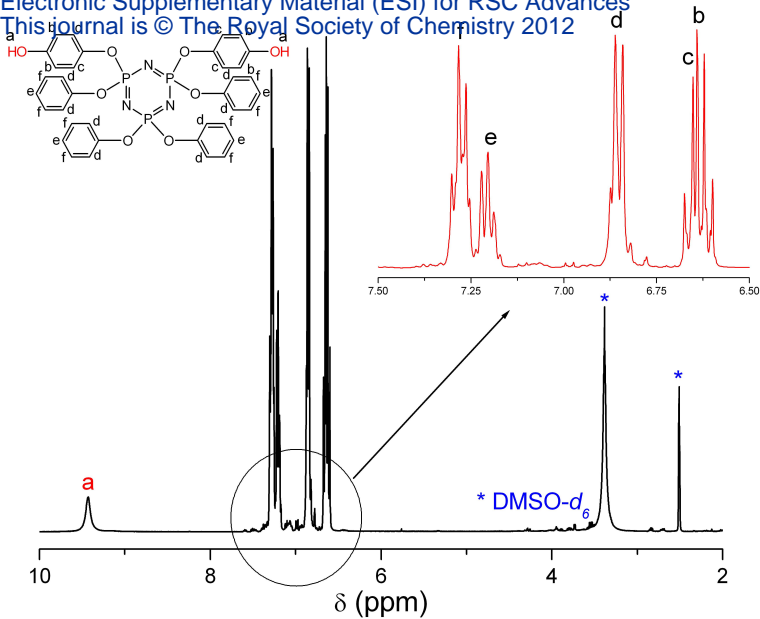

Supplement: c2ra20739g.pdf [file c2ra20739g.pdf]
